1 **Temporal modulation of host aerobic glycolysis determines the outcome of *M.***  
2 ***marinum* infection**

3

4 Lu Meng<sup>1,2¶</sup>, Lingling Xie<sup>1¶</sup>, Yuanqing Kan<sup>1¶</sup>, Lixia Liu<sup>3¶</sup>, Wenyue Dong<sup>3</sup>, Jintao Feng<sup>1</sup>  
5 , Yuchen Yan<sup>1</sup>, Gang Peng<sup>4</sup>, Mingfang Lu<sup>1</sup>, Chen Yang<sup>3</sup>, Chen Niu<sup>1\*</sup>

6

7 <sup>1</sup>MOE&MOH Key Laboratory of Medical Molecular Virology, Department of  
8 Pathogen Biology and Department of Immunology, School of Basic Medical Sciences,  
9 Fudan University, China

10 <sup>2</sup>CAS Key Laboratory of Molecular Virology and Immunology, Institut Pasteur of  
11 Shanghai

12 <sup>3</sup>Shanghai Institute of Plant Physiology and Ecology, Shanghai Institutes of Biologic  
13 Sciences (SIBS), Chinese Academy of Sciences, Shanghai, China; Chinese Academy  
14 of Sciences, China

15 <sup>4</sup>Institute of Brain Sciences, Fudan University, China.

16

17 \*Corresponding author

18 E-mail: [chniu@fudan.edu.cn](mailto:chniu@fudan.edu.cn)

19

20 ¶These authors contributed equally to this work.

21

22

23 **Abstract**

24 Macrophages are the first-line host defense where the invading *Mycobacterium*  
25 *tuberculosis* (Mtb) encounters. It has been recently reported that host aerobic glycolysis  
26 was elevated post the infection by a couple of virulent mycobacterial species. However,  
27 whether this metabolic transition is required for host defense against intracellular  
28 pathogens and the underlying mechanisms remain to be further investigated. By  
29 analyzing carbon metabolism, we found that macrophages infected by *M. marinum*, a  
30 surrogate mycobacterial specie to Mtb, showed a strong elevation of glycolysis. Next,  
31 three glycolysis inhibitors were examined for their ability to inhibit mycobacterial  
32 proliferation inside RAW264.7, a murine macrophage-like cell line. Among them, a  
33 glucose analog, 2-deoxyglucose (2-DG) displayed a protective effect on assisting host  
34 to resist mycobacterial infection, which was further validated in zebrafish-infection  
35 model. The phagocytosis of *M. marinum* was significantly decreased in macrophages  
36 pre-treated with 2-DG at concentrations of 0.5 and 1 mM, at which no inhibitory effect  
37 was posed on *M. marinum* growth *in vitro*. Moreover, 2-DG pre-treatment exerted a  
38 significant protective effect on zebrafish larvae to limit the proliferation of *M. marinum*,  
39 and such effect was correlated to tumor necrosis factor alpha (TNF- $\alpha$ ). On the contrary,  
40 the 2-DG treatment post infection did not restrain proliferation of *M. marinum* in WT  
41 zebrafish, and even accelerated bacterial replication in TNF- $\alpha^{-/-}$  zebrafish. Together,  
42 modulation of glycolysis prior to infection boosts host immunity against *M. marinum*  
43 infection, indicating a potential intervention strategy to control mycobacterial infection.

44

45

## 46 **Author Summary**

47 As an intracellular pathogen, Mtb exploits multiple strategies to invade and hijack  
48 macrophages for its own advantages. Accordingly, recent investigations have shown  
49 that Mtb infection is accompanied with an alteration of host glucose metabolism.  
50 Macrophage and zebrafish infection models of *M. marinum*, facilitating our  
51 understanding towards mycobacterial pathogenesis, were applied in this study. We  
52 found that the pre-treatment of macrophages with a glucose analog, 2-DG, inhibited  
53 aerobic glycolysis and made host cells more inert to phagocytose the bud. In infected  
54 zebrafish larvae, bacterial load inside host pretreated with 2-DG remains at a  
55 significantly lower level compared to the untreated group. These findings imply that  
56 the modulation of host glycolysis regulates the fate of *M. marinum* infection, and  
57 indicate a promising metabolic target in TB intervention.

## 58 **Introduction**

59 Tuberculosis (TB), a serious chronic infectious disease caused by *Mycobacterium*  
60 *tuberculosis* (Mtb), is still a major threaten to public health worldwide. The interaction  
61 between Mtb and macrophages was initiated with phagocytosis [1]. Downstream cell  
62 defense events will then be switched on, including phagosome maturation, acidification,  
63 the fusion between phagosome and lysosome. Besides, cytokines including tumor  
64 necrosis factor alpha (TNF- $\alpha$ ) and interleukin 1 beta (IL-1 $\beta$ ) secreted by infected  
65 macrophage cells play important roles mediating host to fight against Mtb infection.  
66 Meanwhile, autophagy plays an interesting role in this interaction [2,3]. However, it  
67 has been illustrated from numerous studies that, through the expression of various  
68 virulent factors, Mtb could dampen these host immune responses and survive the battle  
69 [4,5]. The altered immunometabolism of macrophage was observed post mycobacterial  
70 infection [6]. Among these alterations, the elevation of glycolytic products has been  
71 noticed from a few recent studies [7,8]. Meanwhile, glycolytic pathways were  
72 dramatically induced at transcriptional level [9]. However, the influence of altered host  
73 glycolysis in TB pathogenesis remains to be understood. In this study, *M. marinum*  
74 [10], a surrogate mycobacterial specie to Mtb was utilized. We firstly investigated the  
75 carbon metabolism shift and immune responses of macrophages post *M. marinum*  
76 infection. The glucose uptake and lactate secretion of murine macrophage-like cell line  
77 RAW264.7 (RAW cells) were significantly boosted post infection, and glycolysis was  
78 elevated in infected macrophages. Next, three glycolysis inhibitors were tested for their  
79 effects on the replication of intracellular bacteria, and only 2-DG exerted protective

80 effects via modulating macrophage phagocytosis and following immune responses.

81 Furthermore, the protective effects of 2-DG were validated *in vivo* using *M.*  
82 *marinum*-zebrafish infection model, which is widely used to study the role of host  
83 immunity in mycobacterial pathogenesis [11,12,13]. Specifically, previous studies have  
84 revealed the crucial role of aerobic glycolysis in cytokines production [14,15,16]. We  
85 herein found that TNF- $\alpha$ , an important pro-inflammatory cytokine in TB immunity  
86 [17,18,19], was boosted in mouse peritoneal macrophages upon the 2-DG pre-treatment.  
87 Moreover, 2-DG was applied in both WT and TNF- $\alpha^{-/-}$  zebrafish [20] prior to or upon  
88 *M. marinum* infection, and bacterial proliferation was measured at various time points  
89 post infection. This study herein revealed that serial immune responses were  
90 significantly enhanced by 2-DG pretreatment. In addition, the understanding on the role  
91 of host glycolysis in mycobacterial infection may provide a novel angle on identifying  
92 host metabolic targets in TB intervention.

93

## 94 **Results**

### 95 **Macrophages displayed an elevated glycolysis during *M. marinum* infection**

96 To elucidate the carbon metabolism shift of macrophages upon and post *M.*  
97 *marinum* infection (Fig 1A), glucose uptake and lactate secretion of macrophages post  
98 *M. marinum* infection was firstly determined. A decline of glucose concentration in  
99 culture medium was observed on 24 hour post infection (hpi), which was even more  
100 dramatic on 48 hpi, indicating a significant glucose uptake of RAW cells following *M.*  
101 *marinum* infection (Fig 1B). Meanwhile, the concentration of lactate in cell culture  
102 medium remarkably increased in infected macrophages compared to the uninfected  
103 control on both 24 hpi and 48 hpi. In order to prove that the utilization of glucose is via  
104 glycolysis, RAW cells were lysed at the same time points, and the glycolytic  
105 intermediates were measured. Among them, an increase of fractional labeling for  
106 glycolytic intermediates including hexose-6-phosphate, 3-phosphoglyceric acid, and  
107 pyruvate (Fig 1C) was observed. Together, glucose uptake, lactate secretion, and the  
108 glycolysis were remarkably elevated in RAW cells post *M. marinum* infection. To  
109 determine if increased glycolysis affects the downstream TCA cycle, the relative  
110 concentration of TCA intermediates were calculated. Compared to the uninfected group,  
111 an increased concentration of TCA intermediates (S1 Fig) was observed, and we  
112 speculated that the TCA flux might increase following the elevated glycolysis.

113

114 **Glycolysis inhibitor 2-DG reduced *M. marinum* burden inside macrophages**  
115 **through phagocytosis inhibition**

116 To further address the consequence of enhanced glycolysis of RAW cells upon *M.*  
117 *marinum* infection, several glycolysis inhibitors were added separately or in  
118 combination into cell culture medium at the time of infection. The inhibitors selected  
119 were oxamate, 2-deoxy-D-glucose (2-DG), and sodium dichloroacetate (S2A Fig),  
120 which target several key enzymatic steps of glycolysis including lactate dehydrogenase,  
121 hexokinase, and pyruvate dehydrogenase kinase separately. Among them, only 2-DG  
122 displayed a remarkable effect inhibiting the bacterial burden inside macrophages (S2B  
123 Fig). In addition, the *in vitro* growth of *M. marinum* in 7H9O broth medium was not  
124 inhibited by 2-DG at the concentrations less or equal to 1mM (Fig 2A), but the growth  
125 of *M. marinum* was suppressed when 2-DG concentration was equal or higher than 5  
126 mM.

127 The decreased bacterial load of *M. marinum* recovered in 2-DG treated  
128 macrophages might be caused by either the reduced phagocytosis or enhanced  
129 bactericidal ability of macrophages. First, the effects of 2-DG pretreatment on  
130 phagocytosis of RAW cells were examined, and the inhibitory effects of 2-DG on  
131 phagocytosis were dose-dependent (Fig 2B). When RAW cells were cultivated in  
132 medium containing 0.5 mM and 1 mM concentrations of 2-DG,  $72.9 \pm 15.1$  % and  $62.4$   
133  $\pm 20.0$  % bacilli were phagocytized relative to the untreated group. The tendency of  
134 such inhibition was maintained at later time points (24 and 48 hpi) as shown in Fig 2C.  
135 Hexokinase 2 (HK2) is the first enzyme in glycolysis which phosphorylates glucose to  
136 produce glucose-6-phosphate (G6P). The glucose analogue 2-DG is phosphorylated by  
137 HK2 to 2-DG-P but cannot be further metabolized, thus causes the metabolic block

138 which inhibits glycolysis [21]. Accordingly, we found that the expression of HK2 was  
139 slightly increased in RAW cells post *M. marinum* infection, which was inhibited by 2-  
140 DG pre-treatment (Fig 2D).

141

142 **2-DG pretreatment led to autophagy or apoptosis of RAW cells in a dosage-**  
143 **dependent manner**

144 To determine cellular responses that 2-DG pretreatment might pose on, autophagy  
145 and apoptosis, two pathways among major strategies by which macrophages combat  
146 with *M. marinum* were investigated. Autophagy begins with the formation of double-  
147 membrane autophagosome, following with autophagolysosome development which  
148 could be marked by Cyto-ID. Raw cells were treated 24h and 48h with 2-DG at  
149 concentrations of 0, 1, 5 or 10 mM, followed by FACS analysis (Fig 3A). The treatment  
150 of RAW cells with 1 mM 2-DG for 24h and 48h strongly induced cellular autophagy  
151 (Fig 3B), which was further aggravated when higher concentration of 2-DG was applied.  
152 During autophagosome formation, the cytosolic form of the microtubule-associated  
153 protein 1A/1B-light chain 3 (LC3-I) is converted to lipid-bound LC3-II. Consistently,  
154 positive LC3-II punctative pattern was observed in 2-DG pretreated RAW cells under  
155 confocal microscope (Fig 3C and 3D). Furthermore, increased apoptosis was observed  
156 only when RAW cells received 10 mM 2-DG on both 24h and 48h, indicating that cell  
157 apoptosis was dependent on a relatively high concentration of 2-DG (S3 Fig). Together,  
158 these data indicates that autophagy was induced by a 24h or prolonged treatment of 2-  
159 DG, which might contributes to earlier reduction of intracellular bacilli post *M.*



160 *marinum* infection.

161

## 162 **2-DG pre-treatment inhibited the proliferation of *M. marinum* in WT zebrafish**

163 To examine if 2-DG also exerts protective effects *in vivo*, the *M. marinum*-  
164 zebrafish infection model was utilized. A volume of 1 nL 2-DG at concentrations of 1  
165 or 5 mM was injected into one-cell stage zebrafish embryo on 0 hpf (hour post  
166 fertilization). On 28 hpf, *M. marinum* carrying a plasmid pTEC15 expressing green  
167 fluorescent protein (Mm pTEC15) was injected into the caudal vein at a dosage of 1000  
168 CFU per fish (Fig 4A). To evaluate the diffusion capability of 2-DG, a fluorescent  
169 analog 2-NBDG, was injected and an even diffusion has been observed at 28 hour post  
170 fertilization (hpf) when the infection initiated. Meanwhile, no growth defect of  
171 zebrafish larvae was observed in 2-DG injected WT zebrafish larvae (data not shown).  
172 The pre-treatment of 2-DG exerted a significant protective effect for host to resist *M.*  
173 *marinum* proliferation lasting till 5 dpi, the end time point of experiments (Fig 4B-4D).  
174 We next asked if such protective effects of 2-DG could be achieved through other  
175 treatment methods. To our surprise, protective effects were not observed either when  
176 2-DG was injected with Mm pTEC15 simultaneously (Fig 5C) or immersed into  
177 embryo medium (S4 Fig), whereas rifampicin displaying a known effect to inhibit the  
178 proliferation of *M. marinum* in zebrafish as reported [22].

179

## 180 **2-DG accelerated *M. marinum* proliferation in zebrafish missing TNF- $\alpha$**

181 To understand how 2-DG pretreatment facilitates host to inhibit *M. marinum*

182 proliferation, the transcriptional level of several crucial cytokines related to TB  
183 immunity including TNF- $\alpha$ , IL-6, IL-10 were examined in zebrafish larvae (data not  
184 shown). Among them, the transcriptional level of TNF- $\alpha$  was significantly elevated in  
185 2-DG pretreated zebrafish larvae on 28 hpf (Fig 5A). Consistently, 2-DG pretreatment  
186 had also boosted the secretion of TNF- $\alpha$  in isolated mouse peritoneal macrophages  
187 stimulated with LPS, compared to PBS as a mock (Fig 5B).

188 To demonstrate whether 2-DG protective function *in vivo* is TNF- $\alpha$  dependent,  
189 TNF- $\alpha^{-/-}$  fish previously constructed [20] and maintained in our laboratory was utilized.  
190 Due to the high mortality ratio of TNF- $\alpha^{-/-}$  larvae post 2-DG injection on single cell  
191 stage after multiple trials (data not shown), 2-DG pretreatment in TNF- $\alpha^{-/-}$  larvae could  
192 not be performed. Thus, *M. marinum* and 2-DG were co-injected into TNF- $\alpha^{-/-}$  larvae  
193 on 28 hpf, with WT zebrafish larvae as a control. Intriguingly, 2-DG did not exhibit  
194 protective effects in WT larvae under such experimental condition (Fig 5C), and  
195 accelerated *M. marinum* proliferation in TNF- $\alpha^{-/-}$  larvae instead (Fig 5D). Thus, 2-DG  
196 could not exert protective effects once *M. marinum* had already infected zebrafish  
197 larvae. It suggests that 2-DG posed detrimental effects when TNF- $\alpha$  is missing in host.

## 198 **Discussion**

199 Emerging evidence have indicated that glucose metabolism of host cells altered  
200 post infections by several virulent mycobacterial species. For example, glucose uptake  
201 with a concomitant increase in glucose-6-phosphate dehydrogenase activity was  
202 observed in Schwann cell infected by *M. leprae* [23]. Along with this, the surface  
203 localization of glucose transporters GLUT1 and GLUT3 increased [24]. In addition to  
204 the elevated glucose uptake, macrophage glycolysis was elevated post infection by  
205 either Mtb [8] or *M. avium* [25]. In present study, both the augmented glucose uptake  
206 and elevated glycolysis in RAW cells infected with *M. marinum* were observed,  
207 accompanied with a significant increase of lactate secretion (Fig 1). It indicates that *M.*  
208 *marinum* may apply similar strategies to modulate glycolysis of macrophages.

209 The present study further characterized the consequence of glycolytic modulation  
210 in *M. marinum* infection using 2-DG, both *in vitro* and *in vivo*. In RAW cells, 2-DG  
211 made macrophages more inert to mycobacterial invasion (Fig 2B). A few decades ago,  
212 it had been noticed that 2-DG selectively inhibits Fc and complement receptor-mediated  
213 phagocytosis in mouse peritoneal macrophages [26]. In addition, our findings that  
214 autophagy was induced by the pre-treatment with 1 mM 2-DG (Fig 3) indicated that it  
215 may assist host cells against mycobacterial infections in multiple means. Phagocytosis  
216 and autophagy are both ancient, highly conserved processes respectively involved in  
217 the removal and destruction of organisms in the cytosol. In support of our findings,  
218 effects of 2-DG on several other intracellular bacteria has been studied over the past  
219 two decades.

220 An early study indicates that 2-DG induced metabolic stress on mice to resist the  
221 infection with *Listeria monocytogenes* [27]. Later on, it was found that 2-DG facilitates  
222 the autophagy of A/J mouse macrophages, and suppressed the intracellular  
223 multiplication of *Legionella pneumophila* [28]. In line with it, HK2 integrates  
224 glycolysis and autophagy to confer cellular protection [29], and enzymatic disruption  
225 might be a novel strategy for treating infecting pathogens [30]. Intriguingly, high  
226 concentration of 2-DG (>5 mM) was found to induce apoptotic death of RAW cells (S3  
227 Fig). Since autophagy can be pharmacologically modulated, it is considered as one of  
228 therapeutic opportunities for TB [3]. The potential effects of 2-DG and role of HK2 in  
229 TB pathogenesis are worthy to be further explored.

230 Previous studies using zebrafish model confirmed that TNF- $\alpha$  is indispensable for  
231 controlling the proliferation and dissemination of *M. marinum* [17]. It was illustrated  
232 from this study that protective effects of 2-DG is correlated with TNF- $\alpha$  (Fig 5C and  
233 5D). Hence, we speculated that there is cross-talk between 2-DG and TNF- $\alpha$  mediated  
234 cell pathways. It has been demonstrated that the elevated aerobic glycolysis is beneficial  
235 for macrophage cells and/or host to combat with intracellular Mtb [7], and Mtb could  
236 dampen the levels of proinflammatory IL-1 $\beta$  and increased anti-inflammatory IL-10 via  
237 influencing host cell glycolysis. Additional evidence came from a recent study that  
238 glycolysis inhibition using 2-DG posed detrimental effects on host immunity post *Mtb*  
239 infection of mice [31]. In line with this, 2-DG injection along with *M. marinum*  
240 infection of WT zebrafish did not inhibit bacterial proliferation *in vivo* (Fig 5C).  
241 However, given other findings in this study that 2-DG pre-treatment improve both

242 macrophages and zebrafish to resist the invasion and proliferation of *M. marinum* (Figs  
243 2-4), we speculate that glycolysis might play double-edge sword effects during  
244 mycobacterial pathogenesis. At the initial stage of infection, virulent mycobacteria  
245 might hijack the glycolysis for its invasion into macrophages. Later on, elevated  
246 glycolysis is correlated with boosted host immunity to fight against the bug. It remains  
247 to be elucidated that to which degree these conflicting effects mediate the interaction  
248 between the bacilli and macrophages. A well-known virulence factor, Esat6 was found  
249 to induce metabolic flux perturbations to drive foamy macrophage differentiation [32].  
250 Together with the observation that *Mtb* could utilize various carbon sources inside host  
251 [33], it implies that the altered host glycolytic pathways might be the outcome of the  
252 complicated interaction between pathogenic mycobacterium and host. The present  
253 study implies that timing may be a key factor to determine whether *M. marinum* or  
254 macrophages benefit from the elevated glycolysis during infection.

255       With the increase of multi-drug resistant (MDR) strains of *Mtb* and slow progress  
256 of developing new antimicrobials for treating TB, an emerging concept for treating TB  
257 is host-directed therapy (HDT) [34,35,36]. For example, metformin, a drug used in  
258 treating diabetes, has been validated as a candidate with high potential against TB [37].  
259 Key enzymes involved in glycolysis might be attractive targets for anti-TB drug  
260 screening, in which case glycolysis inhibitors might be potential candidates in HDT,  
261 since 2-DG has already been tested for safety in multiple clinical trials [38]. Our study  
262 underscores the importance of glycolysis in TB pathogenesis, and further study on this  
263 complex interaction is a prerequisite for developing novel HDT strategies for TB.

## 265 **Material and methods**

### 266 **Strains and culture conditions**

267 *M. marinum* M strain (ATCC BAA-535) was routinely cultivated in Middlebrook 7H9  
268 broth or on 7H10 agar enriched with 10% OADC (oleic acid-albumin-dextrose-catalase)  
269 and 0.4% volume/volume (v/v) glycerol. When necessary, 50 µg/ml of hygromycin was  
270 included to maintain *M. marinum* carrying pTEC15, a plasmid carrying GFP under a  
271 mycobacterial promoter [22]. For growth measurement, strains were cultured in 7H9  
272 broth with or without 2-DG. In addition, 0.02% v/v tyloxapol was added into 7H9 broth  
273 to reduce bacterial clumping.

274

### 275 **Macrophage culture conditions and compounds**

276 Dulbecco's Modified Eagle Medium containing 4.5 g/L glucose (Gibco) and 10% FBS  
277 (C-DMEM) were used to cultivate RAW cells. Cells were infected by using single cell  
278 *M. marinum* at a multiplicity of infection (MOI) =1 for 5 hours at 32 °C. Then,  
279 extracellular bacteria were killed using gentamycin at a concentration of 200 µg/ml for  
280 2h, then fresh DMEM were replaced. For phagocytosis assay, RAW cells were infected  
281 by using single cell *M. marinum* at an MOI=10 for 4 hours at 32 °C. Chemicals 2-  
282 Deoxy-D-glucose, oxmate, and DCA were purchased from Sigma.

283

### 284 **Metabolite measurements**

285 The absolute concentration of metabolites was measured on 24 hours post infection (hpi)  
286 and 48 hpi. Glucose and lactate in cell culture medium were quantitated by high

287 pressure liquid chromatography (HPLC) using an Agilent model 1260 instrument  
288 equipped with a Shodex RSpak KC-811 Column (8 × 300 mm; Shodex) and a UV  
289 detector (Agilent) operated at 210 nm. The mobile phase solution was 6 mM HClO<sub>4</sub> in  
290 water and pumped at a flow rate of 1.0 ml/min, the temperature of the column was kept  
291 at 50 °C.

292

293 For the measurement of cellular metabolites, RAW cells were centrifuged and cell  
294 pellets were resuspended in 2 ml of 80:20 (v/v) methanol/water precooled to -80 °C  
295 separately and lysed by mechanical vortexing. After a centrifugation for 3 min at 16200  
296 ×g, the supernatants were collected and analyzed by UPLC system (Waters) coupled to  
297 a Q Exactive hybrid quadrupole–orbitrap mass spectrometer (Thermo Fisher). Injection  
298 volume was 10 µl. Solvent A was 50 mM ammonium acetate adjusted to pH 9.0 with  
299 ammonium hydroxide, and solvent B was acetonitrile. Metabolites were separated with  
300 a Luna NH<sub>2</sub> column (100 mm × 2 mm, 3-µm particle size; Phenomenex). The column  
301 was maintained at 15°C with a solvent flow rate of 0.3 ml min<sup>-1</sup>, and the gradient of B  
302 was as follows: 0 min, 85%; 3 min, 30%; 12 min, 2%; 15 min, 2%; 16 min, 85%; 23  
303 min, 85%. The mass spectrometer with a heated electrospray ionization source was  
304 operated in negative modes, and the key parameters were same as described in [39].  
305 Data were analyzed using the Xcalibur software.

306

307 For [U-13C] glucose labelling experiments, the fractional labeling (FL) of different  
308 metabolites was calculated according to a published protocol [40] as following:

309

$$FL = \frac{\sum_{i=0}^n i \cdot m_i}{n \cdot \sum_{i=0}^n m_i}$$

310 where  $n$  represents the number of C atoms in the considered fragment and  $i$  the different

311 mass isotopomers,  $m_i$  represents the amount of the compound with  $i \times ^{13}\text{C}$  atom.

312

### 313 **Zebrafish Infection**

314 AB wild type (WT) and TNF- $\alpha^{-/-}$  mutant zebrafish [17] were utilized in this study. For

315 larval infection, experiments were performed as described in a recent paper [41].

316 Regarding the dosage of 2DG injection, 1 nL of 2-DG at 10 mM concentration at the

317 single cell level of zebrafish larvae is approximately 50 mg/kg body weight, which is

318 in the safety range among multiple clinical trials [38].

319

### 320 **Animal Ethics Statement**

321 All experiments using zebrafish in this study was adhered to the protocol, which was

322 reviewed and approved by Institutional Animal Care and Use Committee (IACUC) of

323 Fudan University. The approval and identification number is # 20120105–001, and the

324 protocol is adhered to the regulations/guidelines by Office of Laboratory Animal

325 Welfare, NIH.

326

327 Briefly, zebrafish are euthanized in a manner that minimizes their discomfort, pain, and

328 the time to death. Fish are euthanized by an excess dose of buffered MS-222 (tricaine)

329 on ice, 150-250 ppm (milligrams per liter), depending on the animals' size, age and



330 duration of anesthesia. The zebrafish are placed in an immersion both with tricaine, and  
331 placed on ice. If no movements are observed after 15 minutes, the euthanasia is  
332 complete. This method is consistent with the recommendations of the AVMA  
333 Guidelines on Euthanasia. The dead or euthanized fish and their waste water will be  
334 disinfected with a 10% bleach solution (final concentration) or a 2% alkaline  
335 glutaraldehyde solution for a minimum of 30 minutes. The dead or euthanized fish are  
336 placed in specific labeled biohazards bags and disposed in biohazards waste containers  
337 for pick-up by the biohazards waste disposal company that is contracted by Fudan  
338 University.

339

#### 340 **Imaging of macrophages and zebrafish**

341 Zebrafish were imaged under FITC channel of AMG EVOS fluorescence microscope.  
342 Bacterial burdens of *M. marinum* were determined in larvae by measuring fluorescence  
343 pixel counts (FPC) through the ImageJ software. For immunostaining of autophagy  
344 marker LC3-II in RAW cells, fluorescence signals were detected by using confocal  
345 laser scanning microscopy (CLSM) Leica SP8 at an excitation wavelength of 375 and  
346 543 nm separately. Images were processed using LASAF Lite software.

347

#### 348 **FACS Assay**

349 Raw cells were cultured in C-DMEM contain different concentration of 2-DG (0, 1, 5  
350 and 10mM). For apoptosis analysis, at 24h or 48h, cells of each treatment group were  
351 collected by repeated blow and wash once by C-DMEM. After a quick spin (500g,

352 5min), Raw cells were resuspended in 100ul Binding buffer, then 50ul antibody solution  
353 contain 0.5ul Annexin V FITC (1/100) and 1ul 7AAD PerCP-Cy5.5 (1/50) was added  
354 followed by incubating for 20min in dark. Finally, wash cells for two times using  
355 MACS and resuspend cells in 200ul FACS to perform the FACS assay. Cell apoptosis  
356 was calculated by the percentage of Annexin V+ 7AAD- .

357

358 To determine the autophagy of Raw cells after 2-DG treatment, fluorescent Cyto-ID®  
359 that can stain autophagic vacuoles was obtained from Enzo Life Sciences Inc.  
360 (Farmingdale, NY, USA). Autophagy detection was performed according to the product  
361 manuscript. In brief, at appropriate time point, each sample was washed by DPBS, then  
362 cultured in 200ul C-DMEM containing 0.2ul Cyto-ID Green containing indicator and  
363 incubate at 37C, 5% CO2 in the dark. The Cyto-ID containing medium was wash away  
364 with DPBS. Using cold DPBS containing 2% FBS, cells were resuspend and cell  
365 autophagy analysis was performed through FACS. The mean fluorescence intensity  
366 (MFI) was calculated.

367

## 368 **Acknowledgments**

369 The plasmid pTEC15 was a gift from Lalita Ramakrishnan, University of Cambridge,  
370 UK. We are grateful to insightful advice from Dr. Liangdong Lyu at Fudan  
371 University.

372

373

## 374 **References**

- 375 1. Mortaz E, Adcock IM, Tabarsi P, Masjedi MR, Mansouri D, et al. (2015) Interaction of Pattern  
376 Recognition Receptors with Mycobacterium Tuberculosis. *J Clin Immunol* 35: 1-10.
- 377 2. Siqueira M, Ribeiro RM, Travassos LH (2018) Autophagy and Its Interaction With Intracellular  
378 Bacterial Pathogens. *Front Immunol* 9: 935.
- 379 3. Deretic V (2014) Autophagy in tuberculosis. *Cold Spring Harb Perspect Med* 4: a18481.
- 380 4. Lerner TR, Borel S, Gutierrez MG (2015) The innate immune response in human tuberculosis. *Cell*  
381 *Microbiol* 17: 1277-1285.
- 382 5. O'Garra A, Redford PS, McNab FW, Bloom CI, Wilkinson RJ, et al. (2013) The immune response  
383 in tuberculosis. *Annu Rev Immunol* 31: 475-527.
- 384 6. Shi L, Eugenin EA, Subbian S (2016) Immunometabolism in Tuberculosis. *Front Immunol* 7: 150.
- 385 7. Gleeson LE, Sheedy FJ, Palsson-McDermott EM, Triglia D, O'Leary SM, et al. (2016) Cutting Edge:  
386 Mycobacterium tuberculosis Induces Aerobic Glycolysis in Human Alveolar Macrophages That Is  
387 Required for Control of Intracellular Bacillary Replication. *J Immunol* 196: 2444-2449.
- 388 8. Shi L, Salamon H, Eugenin EA, Pine R, Cooper A, et al. (2015) Infection with Mycobacterium  
389 tuberculosis induces the Warburg effect in mouse lungs. *Sci Rep* 5: 18176.
- 390 9. Du P, Sohaskey CD, Shi L (2016) Transcriptional and Physiological Changes during Mycobacterium  
391 tuberculosis Reactivation from Non-replicating Persistence. *Front Microbiol* 7: 1346.
- 392 10. Tobin DM, Ramakrishnan L (2008) Comparative pathogenesis of Mycobacterium marinum and  
393 Mycobacterium tuberculosis. *Cell Microbiol* 10: 1027-1039.
- 394 11. Meijer AH (2016) Protection and pathology in TB: learning from the zebrafish model. *Semin*  
395 *Immunopathol* 38: 261-273.
- 396 12. Ramakrishnan L (2013) The zebrafish guide to tuberculosis immunity and treatment. *Cold Spring*  
397 *Harb Symp Quant Biol* 78: 179-192.
- 398 13. Lieschke GJ, Currie PD (2007) Animal models of human disease: zebrafish swim into view. *Nat Rev*  
399 *Genet* 8: 353-367.
- 400 14. Menk AV, Scharping NE, Moreci RS, Zeng X, Guy C, et al. (2018) Early TCR Signaling Induces  
401 Rapid Aerobic Glycolysis Enabling Distinct Acute T Cell Effector Functions. *Cell Rep* 22: 1509-1521.
- 402 15. Chang CH, Curtis JD, Maggi LJ, Faubert B, Villarino AV, et al. (2013) Posttranscriptional control  
403 of T cell effector function by aerobic glycolysis. *Cell* 153: 1239-1251.
- 404 16. Wang B, Liu TY, Lai CH, Rao YH, Choi MC, et al. (2014) Glycolysis-dependent histone deacetylase  
405 4 degradation regulates inflammatory cytokine production. *Mol Biol Cell* 25: 3300-3307.
- 406 17. Clay H, Volkman HE, Ramakrishnan L (2008) Tumor necrosis factor signaling mediates resistance  
407 to mycobacteria by inhibiting bacterial growth and macrophage death. *Immunity* 29: 283-294.
- 408 18. Bean AG, Roach DR, Briscoe H, France MP, Korner H, et al. (1999) Structural deficiencies in  
409 granuloma formation in TNF gene-targeted mice underlie the heightened susceptibility to aerosol  
410 Mycobacterium tuberculosis infection, which is not compensated for by lymphotoxin. *J Immunol* 162:  
411 3504-3511.
- 412 19. Kaneko H, Yamada H, Mizuno S, Udagawa T, Kazumi Y, et al. (1999) Role of tumor necrosis factor-  
413 alpha in Mycobacterium-induced granuloma formation in tumor necrosis factor-alpha-deficient mice.  
414 *Lab Invest* 79: 379-386.
- 415 20. Xie L, Wang F, Wang D, Zhao C, Peng G, Niu C (2017). Application of tumor necrosis factor  $\alpha$   
416 mutant zebrafish in *Mycobacterium marinum* infection. *J Microbe Infect* 12(3): 156-163.

- 417 (<http://jmi.fudan.edu.cn/CN/Y2017/V12/I3/156>)
- 418 21. Kang HT, Hwang ES (2006) 2-Deoxyglucose: an anticancer and antiviral therapeutic, but not any  
419 more a low glucose mimetic. *Life Sci* 78: 1392-1399.
- 420 22. Takaki K, Davis JM, Winglee K, Ramakrishnan L (2013) Evaluation of the pathogenesis and  
421 treatment of *Mycobacterium marinum* infection in zebrafish. *Nat Protoc* 8: 1114-1124.
- 422 23. Medeiros RC, Girardi KD, Cardoso FK, Mietto BS, Pinto TG, et al. (2016) Subversion of Schwann  
423 Cell Glucose Metabolism by *Mycobacterium leprae*. *J Biol Chem* 291: 21375-21387.
- 424 24. Dasgupta S, Rai RC (2018) PPAR-gamma and Akt regulate GLUT1 and GLUT3 surface localization  
425 during *Mycobacterium tuberculosis* infection. *Mol Cell Biochem* 440: 127-138.
- 426 25. Appelberg R, Moreira D, Barreira-Silva P, Borges M, Silva L, et al. (2015) The Warburg effect in  
427 mycobacterial granulomas is dependent on the recruitment and activation of macrophages by interferon-  
428 gamma. *Immunology* 145: 498-507.
- 429 26. Michl J, Ohlbaum DJ, Silverstein SC (1976) 2-Deoxyglucose selectively inhibits Fc and complement  
430 receptor-mediated phagocytosis in mouse peritoneal macrophages II. Dissociation of the inhibitory  
431 effects of 2-deoxyglucose on phagocytosis and ATP generation. *J Exp Med* 144: 1484-1493.
- 432 27. Miller ES, Bates RA, Koebel DA, Fuchs BB, Sonnenfeld G (1998) 2-deoxy-D-glucose-induced  
433 metabolic stress enhances resistance to *Listeria monocytogenes* infection in mice. *Physiol Behav* 65:  
434 535-543.
- 435 28. Matsuda F, Fujii J, Yoshida S (2009) Autophagy induced by 2-deoxy-D-glucose suppresses  
436 intracellular multiplication of *Legionella pneumophila* in A/J mouse macrophages. *Autophagy* 5: 484-  
437 493.
- 438 29. Tan VP, Miyamoto S (2015) HK2/hexokinase-II integrates glycolysis and autophagy to confer  
439 cellular protection. *Autophagy* 11: 963-964.
- 440 30. Zhou W, Debnath A, Jennings G, Hahn HJ, Vanderloop BH, et al. (2018) Enzymatic chokepoints  
441 and synergistic drug targets in the sterol biosynthesis pathway of *Naegleria fowleri*. *PLoS Pathog* 14:  
442 e1007245.
- 443 31. Huang L, Nazarova EV, Tan S, Liu Y, Russell DG (2018) Growth of *Mycobacterium tuberculosis* in  
444 vivo segregates with host macrophage metabolism and ontogeny. *J Exp Med* 215: 1135-1152.
- 445 32. Singh V, Kaur C, Chaudhary VK, Rao KV, Chatterjee S (2015) M. tuberculosis Secretory Protein  
446 ESAT-6 Induces Metabolic Flux Perturbations to Drive Foamy Macrophage Differentiation. *Sci Rep*  
447 5: 12906.
- 448 33. Eoh H, Wang Z, Layre E, Rath P, Morris R, et al. (2017) Metabolic anticipation in *Mycobacterium*  
449 *tuberculosis*. *Nat Microbiol* 2: 17084.
- 450 34. Kiran D, Podell BK, Chambers M, Basaraba RJ (2016) Host-directed therapy targeting the  
451 *Mycobacterium tuberculosis* granuloma: a review. *Semin Immunopathol* 38: 167-183.
- 452 35. Wallis RS, Hafner R (2015) Advancing host-directed therapy for tuberculosis. *Nat Rev Immunol* 15:  
453 255-263.
- 454 36. Tobin DM (2015) Host-Directed Therapies for Tuberculosis. *Cold Spring Harb Perspect Med* 5.
- 455 37. Singhal A, Jie L, Kumar P, Hong GS, Leow MK, et al. (2014) Metformin as adjunct antituberculosis  
456 therapy. *Sci Transl Med* 6: 159r-263r.
- 457 38. Xi H, Kurtoglu M, Lampidis TJ (2014) The wonders of 2-deoxy-D-glucose. *IUBMB Life* 66: 110-  
458 121.
- 459 39. Zhang H, Liu Y, Nie X, Liu L, Hua Q, et al. (2018) The cyanobacterial ornithine-ammonia cycle  
460 involves an arginine dihydrolase. *Nat Chem Biol* 14: 575-581.

461 40. Nanchen A, Fuhrer T, Sauer U (2007) Determination of metabolic flux ratios from  $^{13}\text{C}$ -experiments  
462 and gas chromatography-mass spectrometry data: protocol and principles. *Methods Mol Biol* 358: 177-  
463 197.

464 41. Tong J, Meng L, Wang X, Liu L, Lyu L, et al. (2016) The FBPase Encoding Gene *glpX* Is Required  
465 for Gluconeogenesis, Bacterial Proliferation and Division In Vivo of *Mycobacterium marinum*. *PLoS*  
466 *One* 11: e156663.

467

468

469

## 470 **Figure Captions**

471 **Fig 1. The increased glucose uptake, lactate secretion and glycolysis of**

472 **RAW264.7 cells post *M. marinum* infection.**

473 (A) Sketch of glucose uptake and glycolysis pathway. (B) The relative concentrations

474 of glucose and lactate in cell culture were measured by HPLC at 24 hpi and 48 hpi

475 (black bar), uninfected control is depicted as white bar. The degree of glucose uptake

476 was calculated as the reduction of glucose concentration in cell culture medium,

477 which was normalized to the original concentration (4.5 g/L) in C-DMEM. (C) The

478 fractional labeling (FL) of several other glycolytic intermediates were calculated in

479 lysed RAW264.7 cells cultivated in KO-DMEM plus [U- $^{13}\text{C}$ ] glucose as the sole

480 glucose source.

481

482 **Fig 2. 2-DG pretreatment inhibited phagocytosis of *M. marinum* by RAW264.7**

483 **cells.**

484 (A) The *in vitro* growth of *M. marinum* in 7H9+OADC broth containing various

485 concentrations of 2-DG. (B-C)  $1 \times 10^5$  RAW264.7 cells untreated or pretreated with 2-

486 DG (0.1, 0.5, 1 and 5mM) were infected by *M. marinum* at MOI = 10. At various time

487 points post infection, RAW264.7 cells were rinsed and lysed, intracellular bacterial load

488 of *M. marinum* load was measured by spreading onto 7H10+OADC agar plates. For  
489 statically analysis, Student's T test was performed between 2-DG pretreated groups and  
490 the untreated group. \*,  $p < 0.05$ , "ns", no significant difference. (B) 24 hpi, (C) 48 hpi.  
491 (D) Relative HK2 protein levels in RAW264.7 cells were determined by western blot  
492 analysis.

493

494 **Fig 3. Effect of 2-DG treatment on autophagic death.**

495 (A) Representative flow cytometric dot plots illustrating autophagy of Raw264.7 cells  
496 treated with 2-DG at 0, 1, 5 and 10 mM for 24h and 48h. 1  $\mu$ M Rapamycin applied in  
497 Cyto-ID® Kit was used as positive control. (B) Bar graphs presenting the degree of  
498 autophagy treated with 2-DG at 0, 1, 5 and 10  $\mu$ M for 24 h and 48h. Cells were treated  
499 with green fluorescent Cyto-ID® to detect autophagic vacuoles and subjected to flow  
500 cytometric analysis. Data are the mean  $\pm$  SD values of three independent experiments.  
501 \*\* $P < 0.05$  by two-tailed t test. (C&D) 2-DG pretreatment induced autophagy in  
502 RAW264.7 cells. Cell nuclei were stained using Hoechst dye and the red fluorescence  
503 marked LC3-II which aggregates during autophagy in cytoplasm. (C) Control group  
504 (without 2-DG) and (D) Cells treated in DMEM with 1mM 2-DG for 24 hours.

505

506 **Fig 4. *M. marinum* proliferation *in vivo* was inhibited by 2-DG pretreatment.**

507 An initial infection dosage was 1000 colony forming unit (CFU) Mm pTEC15 per  
508 zebrafish larvae. (A) The diagram of 2-DG injection on 0 hpf and infection of larvae  
509 with Mm pTEC15 on 28 hpf. (B-D) Bacterial load in zebrafish larvae were measured

510 on various time points post infection. Zebrafish were imaged using AMG EVOS  
511 fluorescence microscope, and bacterial load were analyzed by counting fluorescence  
512 pixels of images using software Image J. (B) 1 dpi, (C) 3dpi, and (D) 5 dpi.

513

514 **Fig 5. 2-DG accelerates *in vivo* proliferation of *M. marinum* in zebrafish lack of**  
515 **TNF- $\alpha$ .**

516 (A) The transcription of TNF- $\alpha$  in zebrafish larvae on 28 hpf 2-DG pretreatment. (B)  
517 The 2-DG pretreatment augments TNF- $\alpha$  secretion by mouse peritoneal macrophages  
518 cultured in medium containing LPS. (C) WT zebrafish or (D) TNF- $\alpha^{-/-}$  zebrafish  
519 larvae was infected on 28 hpf by CV injection with a mixture of 2-DG (5 mM) and  
520 200 CFU Mm pTEC15, and bacterial load in zebrafish larvae were measured by  
521 counting fluorescence pixels of images using software Image J.

522

## 523 **Supporting information**

524 **S1 Fig. Elevated TCA cycle of macrophages post *M. marinum* infection.**

525 The relative abundance of each TCA cycle intermediate was calculated by summing  
526 of peak areas of all isotopomers acquired by LC-MS, including (A) citrate, (B)  
527 aconitate, (C) itaconate, (D) isocitrate, (E)  $\alpha$ -KG ( $\alpha$ -ketoglutarate), (F) succinate, (G)  
528 fumarate, and (H) malate. Infected macrophages (Black Bar), the uninfected group  
529 (White Bar).

530

531 **S2 Fig. Intracellular replication of *M. marinum* is significantly inhibited by 2-**

532 **deo-D-glucose.**

533 (A) Metabolic targets of selected inhibitors. (B) Intracellular bacterial load of *M.*

534 *marinum* was calculated on 0, 24, 48 and 72hpi in infected macrophages. Untreated

535 (U) or treated with Oxamate (Ox), 2-deo-D-glucose (2-DG) or sodium dichloroacetate

536 (SD) alone and combination with various drugs.

537

538 **S3 Fig. 2-DG induced apoptotic death in Raw264.7 cells in a concentration -**

539 **dependent manner.**

540 (A) Representative flow cytometric dot plots showing the percentage of specific cell

541 populations (live, early apoptosis, and late apoptosis) in Raw264.7 cells treated with

542 2DG at 0, 1, 5 and 10 mM for 24 h and 48h. (B) bar graphs showing the percentage of

543 apoptotic cells in Raw264.7 cells treated with 2DG at 0, 1, 5 and 10 mM for 24 h and

544 48h. Cells were double stained using annexin V:FITC and 7-AAD PerCP-Cy5.5 to

545 detect cells undergoing early apoptosis (left) and late apoptosis (right). Data are the

546 mean  $\pm$  SD of three independent experiments. \*\*P<0.05 by two-tailed t test.

547

548 **S4 Fig. The *in vivo* proliferation of *M. marinum* was not inhibited by 2-DG added**

549 **into embryo medium.**

550 WT zebrafish was infected on 28 hpf by caudal vein injection with an Initial dosage of

551 200 cfu per fish, and bacterial load of *Mm* pTEC15 in zebrafish larvae were measured

552 by counting fluorescence pixels of images using software Image J. (A) 1 dpi, (B) 2

553 dpi, (C) 3 dpi, (D) 4 dpi.



**A**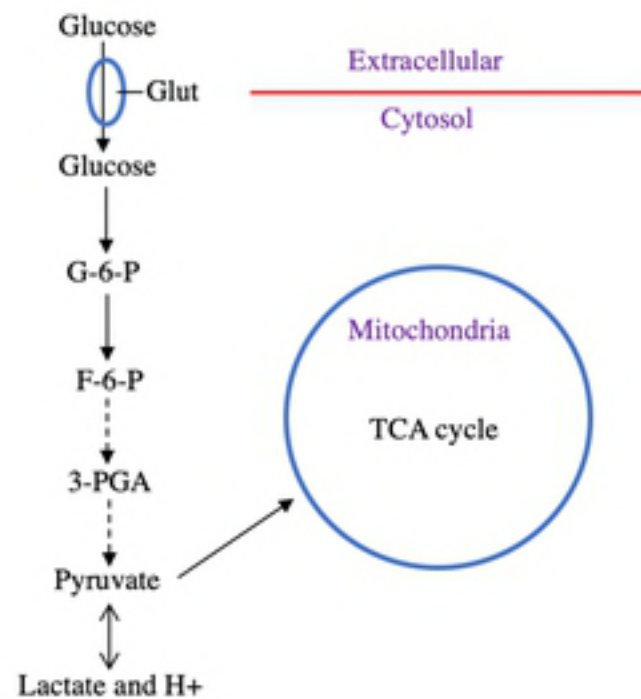**B**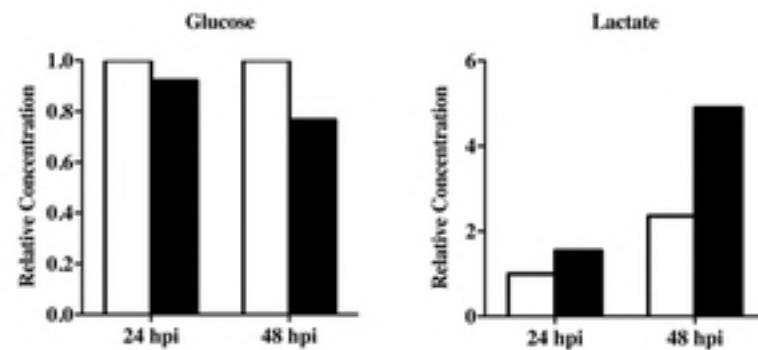**C**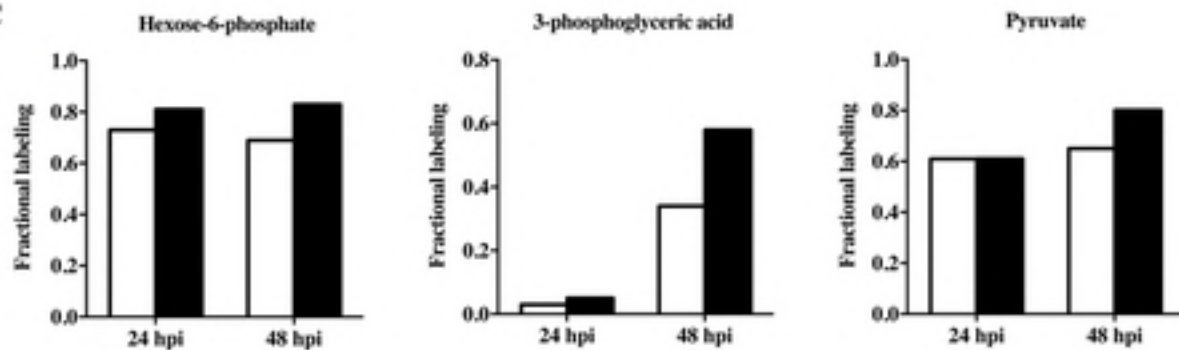

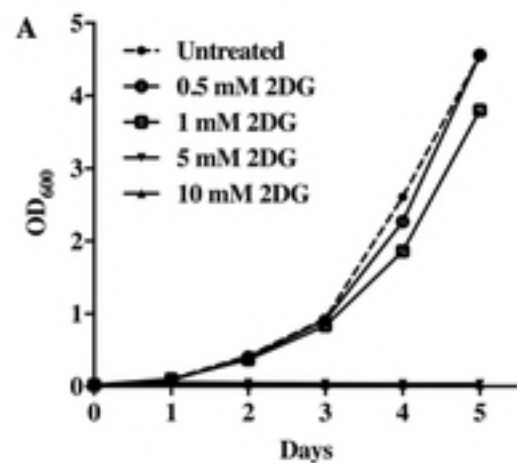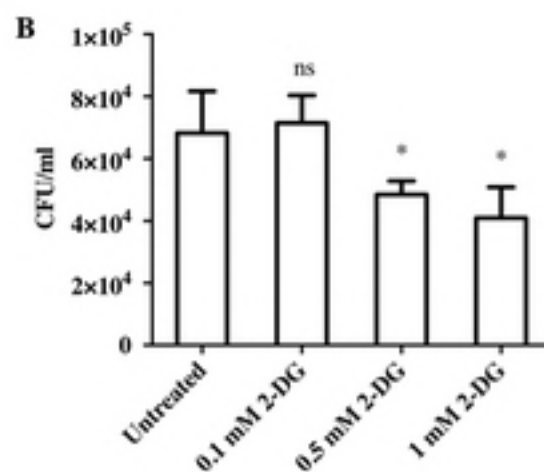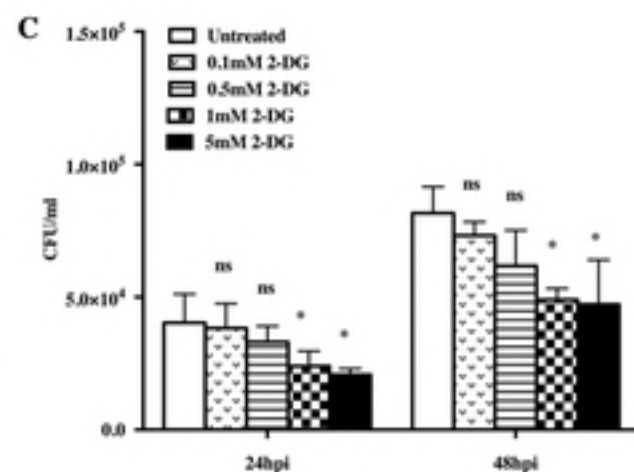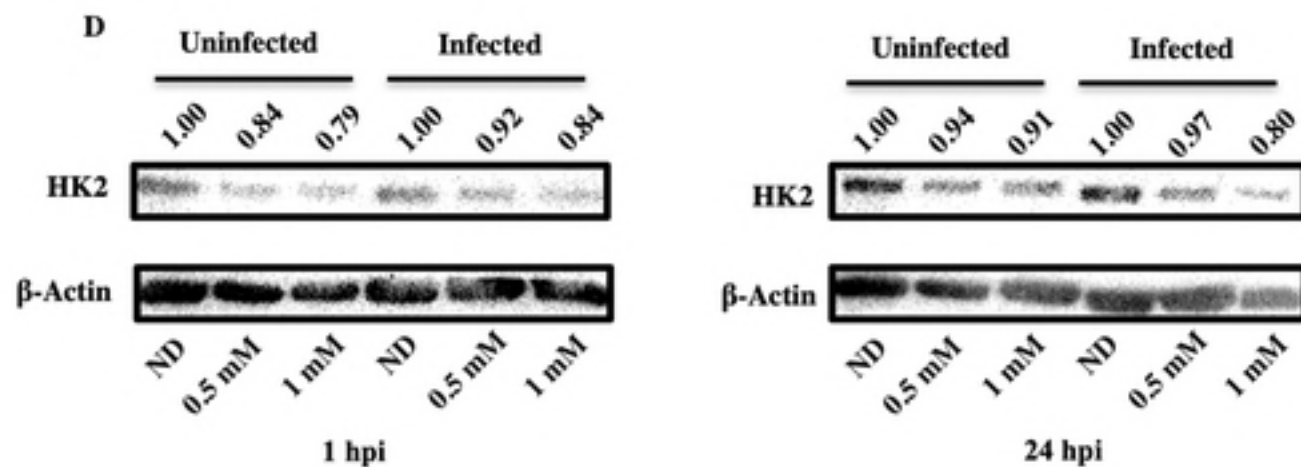

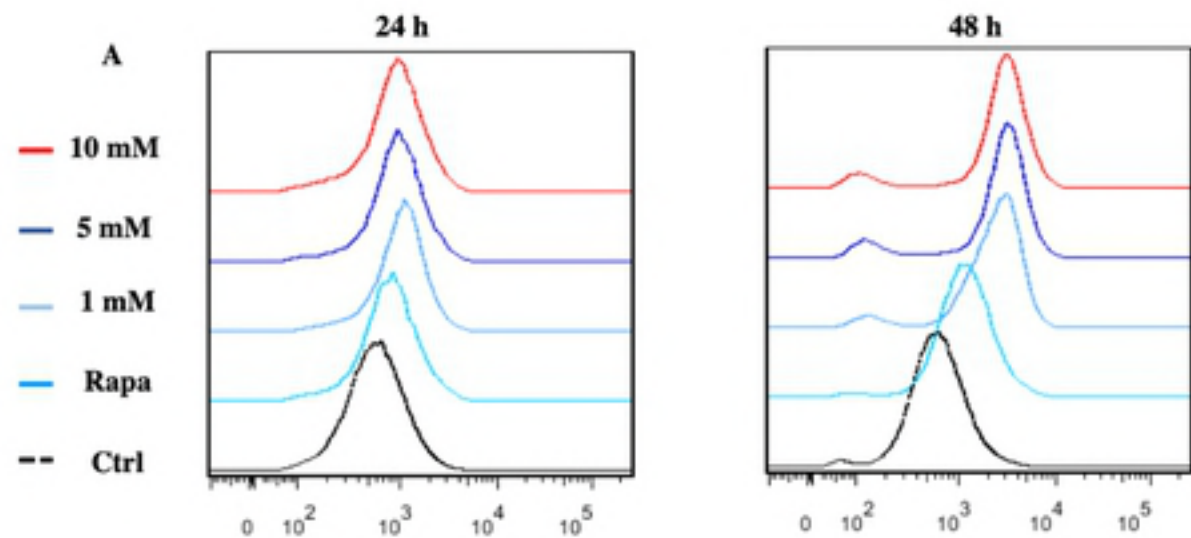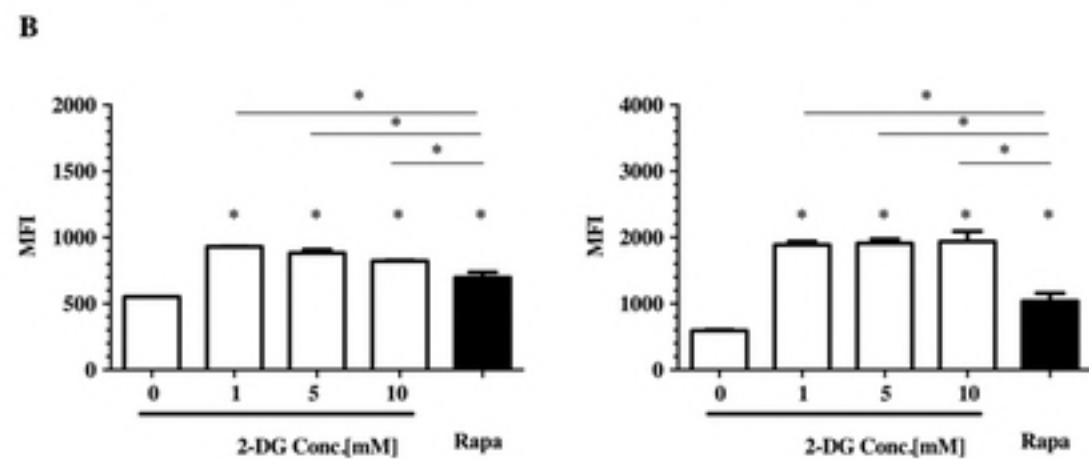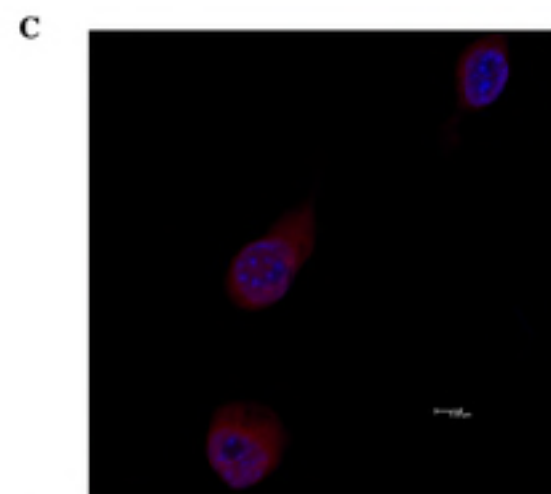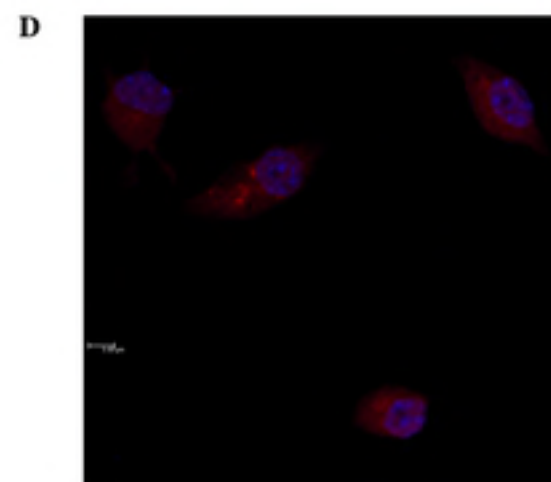

**A**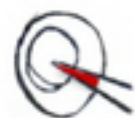

2DG injection into  
single cell zebrafish  
embryos

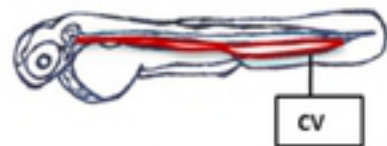

Mm pTEC15 (green  
fluorescence plasmid  
infection on 28hpf)

**B**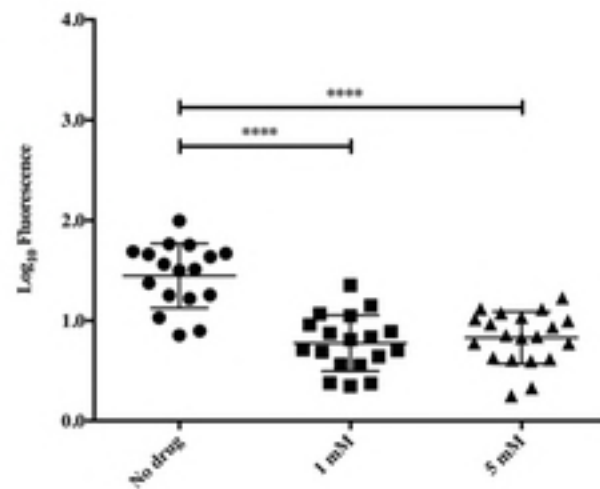**C**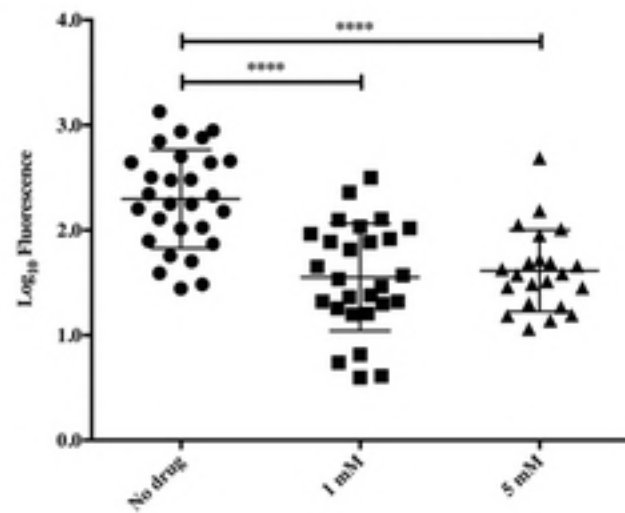**D**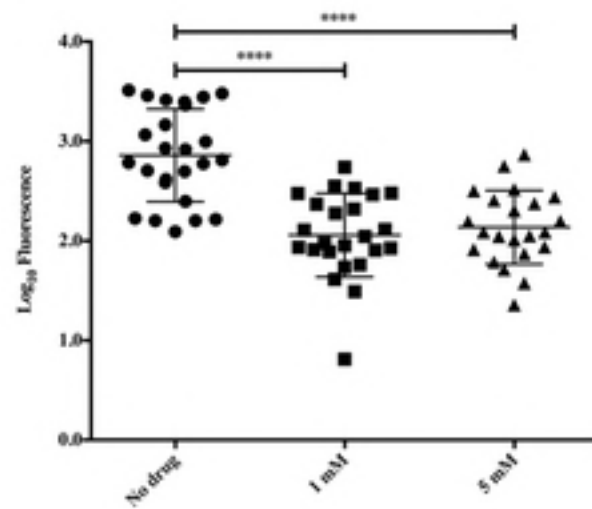

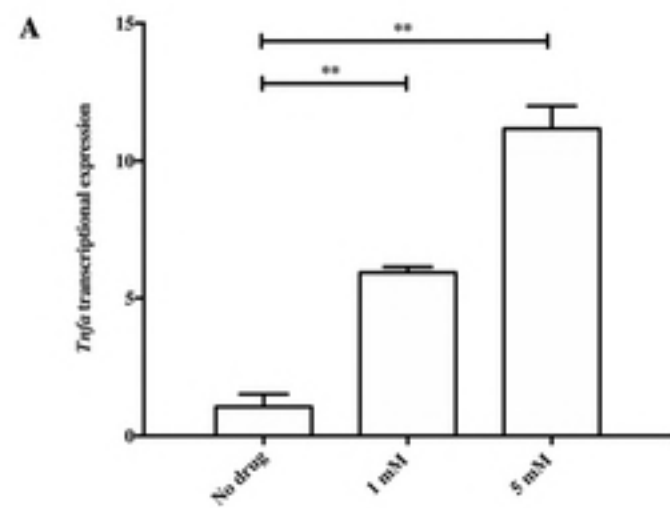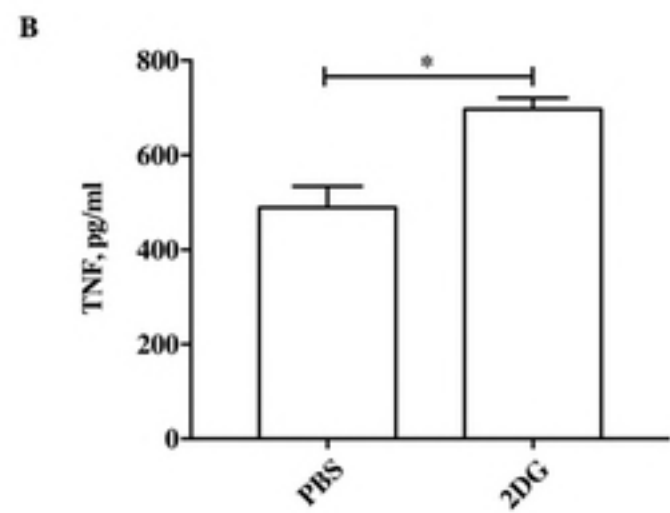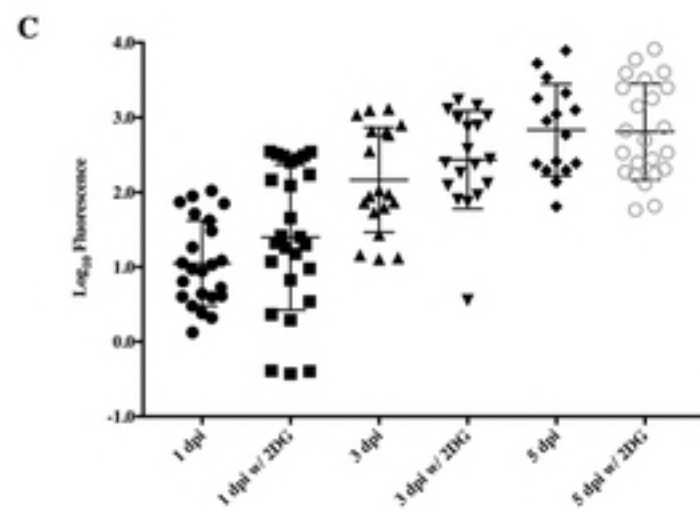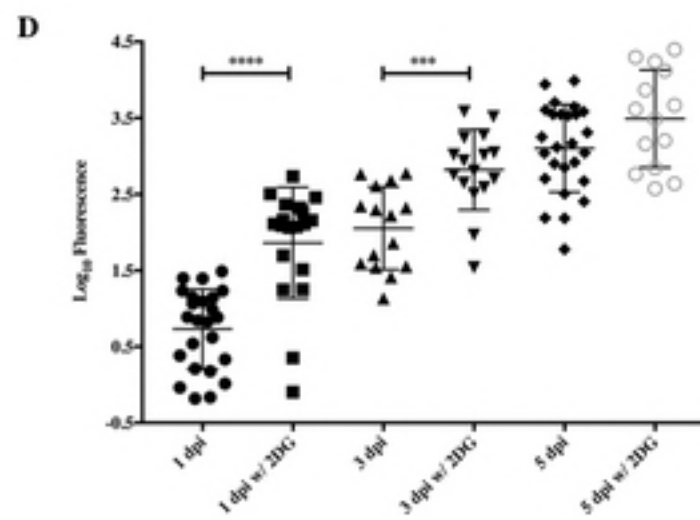

Source: https://www.biorxiv.org/content/10.1101/507160v1.full.pdf
